# Supplementary material
Source: PubMed Central journal article supplement (PMC4303343)

**Supplemental Table 1.** Indications for Colonoscopy

| <b>Colonoscopy Indication</b> | <b>Description</b>                                                                                                                                                         |
|-------------------------------|----------------------------------------------------------------------------------------------------------------------------------------------------------------------------|
| Screening                     | Procedures performed for screening in those who are at average risk for CRC                                                                                                |
| High-risk screening           | Procedures performed for screening in those who are above average risk for developing CRC, such as those with a family history of colon cancer                             |
| Surveillance                  | Procedures performed for in those with personal history of adenomas, sessile serrated lesions, or CRC                                                                      |
| Diagnostic                    | Procedures performed for the presence of any signs (e.g. iron deficiency anemia), symptoms (e.g. change in bowel habits or hematochezia), or follow-up after abnormal FIT. |

CRC – colorectal cancer; FIT – fecal immunochemical test

**Supplemental Table 2:** Importance of Accurately Determining the Indication for Colonoscopy

| Category                   | Examples                                                                                                                                                                                                            |
|----------------------------|---------------------------------------------------------------------------------------------------------------------------------------------------------------------------------------------------------------------|
| Clinical Care              | <p>Procedural urgency and scheduling varies by colonoscopy indication</p> <p>Patient-reported benefits and adherence varies by colonoscopy indication</p>                                                           |
| Payment                    | <p>Insurance companies are required to provide screening (but not surveillance or diagnostic) colonoscopy exams without a co-payment;</p>                                                                           |
| Policy                     | <p>Health systems may prioritize diagnostic and/or surveillance colonoscopy exams (over average-risk screening) given limited endoscopic capacity</p>                                                               |
| Healthcare Quality Metrics | <p>Adenoma detection rates are determined only in subset of colonoscopies performed for average-risk screening</p> <p>Appropriateness of interval for repeat colonoscopy is dependent on colonoscopy indication</p> |
| Clinical Research          | <p>Research on the comparative effectiveness of different colon cancer screening tests and strategies are dependent on accurate determination of indication</p>                                                     |

**Supplemental Table 3.** Summary of prior algorithms classifying colonoscopy indications

| <b>Author, year</b>          | <b>Algorithm</b>                                                                                                                                                                                                                                                                                                                                 | <b>Reference standard</b>                                                                                      | <b>Results</b>                                                                                                                                                                                                                                      |
|------------------------------|--------------------------------------------------------------------------------------------------------------------------------------------------------------------------------------------------------------------------------------------------------------------------------------------------------------------------------------------------|----------------------------------------------------------------------------------------------------------------|-----------------------------------------------------------------------------------------------------------------------------------------------------------------------------------------------------------------------------------------------------|
| Ko, 2012 <sup>34</sup>       | <p>Algorithms were developed using CPT and ICD-9 codes from colonoscopy claim and Medicare claims in prior 12 months.</p> <p>Four-level hierarchical classification of indication (average-risk screening, high-risk screening, surveillance, diagnostic) was based on classification and regression trees and linear discriminant analysis.</p> | Clinical Outcomes Research Initiative database and manual review of the colonoscopy report by three physicians | <p>Algorithms were developed in a training set of 7515 patients and validated in an independent set of 7329 patients</p> <p>Sensitivity for classifying screening exams was 55-86%.<br/>Specificity for classifying screening exams was &gt;95%</p> |
| Haque, 2005 <sup>31</sup>    | Algorithms were developed using ICD-9 codes for conditions within one year prior to colonoscopy, signs and symptoms of GI bleeding within 45 days prior to colonoscopy, and FOBT test within 45 days prior to colonoscopy.                                                                                                                       | Manual chart review by two trained abstractors                                                                 | <p>Algorithm was developed in a set of 95 patients</p> <p>Sensitivity for classifying screening exam was 84%<br/>Specificity for determining screening exam was 76%</p>                                                                             |
| El-Serag, 2006 <sup>32</sup> | Algorithms were developed using ICD-9 codes for conditions within one year prior                                                                                                                                                                                                                                                                 | Manual chart review by two physicians                                                                          | Algorithm was developed in a set of 303 patients                                                                                                                                                                                                    |

|                             |                                                                                                                                                                                                                                                                                                                                                                                           |                                           |                                                                                                                                                                                                                                                                                |
|-----------------------------|-------------------------------------------------------------------------------------------------------------------------------------------------------------------------------------------------------------------------------------------------------------------------------------------------------------------------------------------------------------------------------------------|-------------------------------------------|--------------------------------------------------------------------------------------------------------------------------------------------------------------------------------------------------------------------------------------------------------------------------------|
|                             | to colonoscopy.                                                                                                                                                                                                                                                                                                                                                                           |                                           | Sensitivity for classifying screening exam was 70%<br>Specificity for determining screening exam was 72%                                                                                                                                                                       |
| Fisher, 2010 <sup>33</sup>  | Algorithms were developed using ICD-9 codes for conditions within one year prior to colonoscopy. Modifications of El-Serag algorithm by removing ICD-9 codes for upper GI symptoms and abdominal pain as well as all ICD-9 codes from day of the colonoscopy. This modification also used data regarding prior FOBT, flexible sigmoidoscopy, and colonoscopy exams during the prior year. | Manual chart review by trained abstractor | Algorithm was developed in a set of 650 patients<br><br>Sensitivity for classifying screening exam was 30-57%<br>Specificity for determining screening exam was 81-93%                                                                                                         |
| Sewitch, 2010 <sup>25</sup> | Algorithm was based on pre-procedure patient self-report                                                                                                                                                                                                                                                                                                                                  | Endoscopist impression of indication      | Algorithm was developed in a set of 702 patients<br><br>Concordance for classifying screening exam was 83%<br>Kappa 0.67 (95%CI 0.61 – 0.72)<br><br>Concordance for classifying surveillance exam was 85%<br>Kappa 0.70 (95%CI 0.65 – 0.75)<br><br>Concordance for classifying |

|                                |                                                                                                                                                                                                                                                                                                                                                                  |                                                                                                                                                                       |                                                                                                                                                                                                                                                                                                                                      |
|--------------------------------|------------------------------------------------------------------------------------------------------------------------------------------------------------------------------------------------------------------------------------------------------------------------------------------------------------------------------------------------------------------|-----------------------------------------------------------------------------------------------------------------------------------------------------------------------|--------------------------------------------------------------------------------------------------------------------------------------------------------------------------------------------------------------------------------------------------------------------------------------------------------------------------------------|
|                                |                                                                                                                                                                                                                                                                                                                                                                  |                                                                                                                                                                       | diagnostic exam was 79%<br>Kappa 0.58 (95%CI 0.52 – 0.64)                                                                                                                                                                                                                                                                            |
| Sewitch,<br>2013 <sup>35</sup> | Algorithm was based on logistic regression model using patient age, gender, procedure codes for prior colonoscopy, polypectomy, sigmoidoscopy, and double contrast barium enema in the past 4 years, ICD-9 codes for risk factors (e.g. inflammatory bowel disease, prior colorectal cancer) in the past 5 years, and ICD-9 codes for symptoms in the past year. | Two reference standards were used.<br><br>Reference standard #1:<br>Bayesian latent class model<br><br>Reference standard #2:<br>Endoscopist impression of indication | Algorithm was developed in a set of 702 patients<br><br>Reference standard #1:<br>Sensitivity for classifying screening exam was 85%<br>Specificity for determining screening exam was 63%<br><br>Reference standard #2:<br>Sensitivity for classifying screening exam was 85%<br>Specificity for determining screening exam was 62% |
| Harkema<br>2011 <sup>36</sup>  | Algorithm was based on natural language processing                                                                                                                                                                                                                                                                                                               | Manual chart review                                                                                                                                                   | Algorithm was developed in a set of 453 patients<br><br>Concordance for classifying screening exam was 82%<br><br>Kappa 0.67                                                                                                                                                                                                         |

CPT – Current Procedural Terminology; ICD-9 – International Classification of Diseases  
– Ninth edition; FOBT – fecal occult blood test

## **SUPPLEMENTAL FIGURE**

**Figure Title:** Different Perspectives on the Indication for Colonoscopy

**Figure Legend:** It is possible that the same procedure could be classified with different indications, depending on the perspective. A patient with a first-degree relative who had CRC should be regarded as “high-risk screening”; however, a provider may have referred the patient for “average-risk screening”. If the patient reports symptoms at the time of exam, these may be recorded and the exam considered diagnostic to evaluate these symptoms. Finally, if a researcher looks back and observes a prior positive FIT, the exam might be considered as a follow-up diagnostic exam.

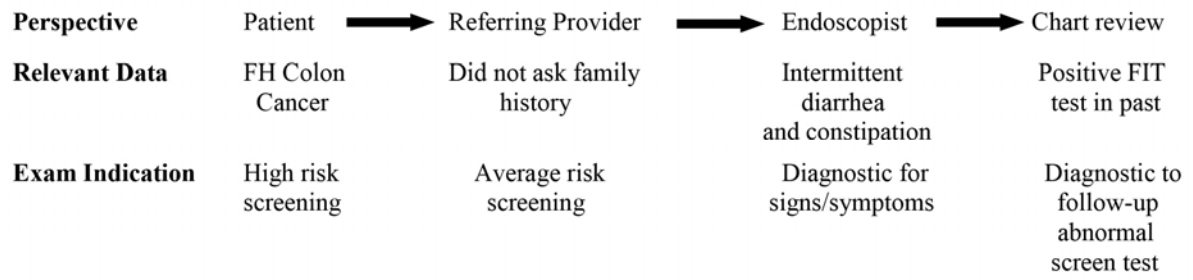

Supplement: NIHMS628922-supplement-01.pdf [file NIHMS628922-supplement-01.pdf]
